# Supplementary material for: Recanalization Therapies for Large Vessel Occlusion Due to Cervical Artery Dissection: A Cohort Study of the EVA-TRISP Collaboration
Source: PubMed Central journal article supplement — J Stroke. 2023 May 30;25(2):272–81. doi: 10.5853/jos.2022.03370 (PMC10250869; doi:10.5853/jos.2022.03370), 2023-05-30
Supplement: jos-2022-03370-Supplementary-Table-1.pdf [file jos-2022-03370-Supplementary-Table-1.pdf]

**Supplementary Table 1.** Baseline, clinical, and stroke characteristics in patients with LVO in the anterior circulation

|                                                    | EVT (n=198)            | IVT (n=35)              | OR (95% CI)      | P      |
|----------------------------------------------------|------------------------|-------------------------|------------------|--------|
| <b>Demographics</b>                                |                        |                         |                  |        |
| Age (yr)                                           | 54 (47–61)             | 53 (45–61)              | -                | 0.730  |
| Female sex                                         | 44/198 (22.2)          | 13/35 (37.1)            | 0.48 (0.23–1.04) | 0.058  |
| <b>Medical history</b>                             |                        |                         |                  |        |
| Atrial fibrillation                                | 8/198 (4.0)            | 0/35 (0)                | -                | 0.266  |
| Hypertension                                       | 68/198 (34.3)          | 15/35 (42.9)            | 0.69 (0.34–1.45) | 0.332  |
| Current smoking (or stopped less than 2 years ago) | 56/194 (28.9)          | 7/35 (20.0)             | 1.62 (0.67–3.93) | 0.280  |
| Hypercholesterolemia                               | 55/198 (27.8)          | 11/35 (31.4)            | 0.84 (0.39–1.83) | 0.659  |
| Diabetes mellitus                                  | 8/198 (4.0)            | 3/35 (8.6)              | 0.54 (0.11–1.78) | 0.218  |
| Coronary artery disease                            | 7/198 (3.5)            | 2/35 (5.7)              | 0.60 (0.12–3.04) | 0.403  |
| Prior stroke (ischemic or hemorrhagic)             | 16/193 (8.3)           | 8/35 (22.9)             | 0.31 (0.12–0.78) | 0.010  |
| Pre-stroke independency (pre-stroke mRS 0–2)       | 192/194 (99.0)         | 35/35 (100)             | -                | 0.717  |
| <b>Vital signs and laboratory results</b>          |                        |                         |                  |        |
| Systolic blood pressure (mm Hg)                    | 150 (135–165) (n=192)  | 150 (133–171) (n=34)    | -                | 0.695  |
| Glucose on admission (mmol/L)                      | 6.4 (5.6–7.3) (n=187)  | 5.72 (5.26–6.08) (n=33) | -                | 0.002  |
| CRP on admission (mg/L)                            | 2.7 (1–5.3) (n=172)    | 1 (0.5–3.00) (n=20)     | -                | 0.048  |
| Leucocytes on admission ( $\times 10^9/L$ )        | 9.3 (7.4–11.4) (n=168) | 8.7 (7.71–10.7) (n=26)  | -                | 0.790  |
| Creatinine on admission ( $\mu\text{mol/L}$ )      | 78 (68–88.0) (n=189)   | 76.0 (62.6–88.0) (n=66) | -                | 0.964  |
| <b>Stroke characteristics and stroke treatment</b> |                        |                         |                  |        |
| Wake up stroke                                     | 33/183 (18.0)          | 3/35 (8.6)              | 2.35 (0.68–8.13) | 0.126  |
| NIHSS at admission                                 | 14.5 (10–18)           | 5 (3–9)                 | -                | <0.001 |
| Onset-to-needle (min)                              | 104 (75–155) (n=133)   | 138 (93–183) (n=34)     | -                | 0.022  |
| Onset-to-groin (min)                               | 180 (135–303) (n=188)  | -                       | -                | -      |

Data are presented as median (IQR) or n (%) unless otherwise indicated.

LVO, large vessel occlusion; EVT, endovascular treatment; IVT, intravenous thrombolysis; OR, odds ratio; CI, confidence interval; mRS, modified Rankin Scale; CRP, C-reactive protein; NIHSS, National Institutes of Health Stroke Scale score; IQR, interquartile range.
